# Supplementary material for: BreakDancer: an algorithm for high-resolution mapping of genomic structural variation
Source: Springer Nature journal article supplement (doi:10.1038/nmeth.1363), 2009-08-09
Supplement: 41592_2009_BFnmeth1363_MOESM243_ESM.pdf [file 41592_2009_BFnmeth1363_MOESM243_ESM.pdf]

## BreakDancer: an algorithm for high-resolution mapping of genomic structural variation

Ken Chen, John W Wallis, Michael D McLellan, David E Larson, Joelle M Kalicki, Craig S Pohl, Sean D McGrath, Michael C Wendl, Qunyan Zhang, Devin P Locke, Xiaoqi Shi, Robert S Fulton, Timothy J Ley, Richard K Wilson, Li Ding & Elaine R Mardis

Supplementary figures and text:

|                                |                                                                                                                                             |
|--------------------------------|---------------------------------------------------------------------------------------------------------------------------------------------|
| <b>Supplementary Figure 1</b>  | The size of indels detectable by MAQ paired end Smith-Waterman alignment algorithm                                                          |
| <b>Supplementary Figure 2</b>  | The true positive rate (TPR) w.r.t. coverage in different size bins                                                                         |
| <b>Supplementary Figure 3</b>  | Size and Breakpoint Accuracy of BreakDancerMax in simulation                                                                                |
| <b>Supplementary Figure 4</b>  | Receiver operator characteristics (ROC) w.r.t. the number of anomalous read pairs (n) and the confidence score (Q)                          |
| <b>Supplementary Figure 5</b>  | The true positive rate (TPR) and the false positive rate (FPR) given various separation thresholds                                          |
| <b>Supplementary Figure 6</b>  | The Receiver Characteristic (ROC) of BreakDancerMini at different threshold of $D_{nn}$                                                     |
| <b>Supplementary Figure 7</b>  | Accuracy of variant size estimated by BreakDancerMini                                                                                       |
| <b>Supplementary Figure 8</b>  | Percent overlap between the AML structural variants and the DGV (v5) as functions of the confidence score or number of anomalous read pairs |
| <b>Supplementary Figure 9</b>  | AML validation result with respect to variant size and confidence score                                                                     |
| <b>Supplementary Figure 10</b> | Plots of identified inversions and intra-chromosomal translocations in the AML genome                                                       |
| <b>Supplementary Figure 11</b> | The analytic true positive rate with respect to variant size and coverage                                                                   |
| <b>Supplementary Figure 12</b> | The insert size distribution of the libraries in the AML project                                                                            |
| <b>Supplementary Table 2</b>   | Number and type of structural variants detected by BreakDancerMax in the tumor-normal paired AML genome.                                    |
| <b>Supplementary Table 4</b>   | The paired end libraries used for the structural variation detection of the 1000 genomes trio individuals                                   |
| <b>Supplementary Table 5</b>   | Deletions detected by BreakDancerMax on chromosome 5 of NA12878                                                                             |
| <b>Supplementary Table 6</b>   | Deletions detected by BreakDancerMax on chromosome 5 of NA19240                                                                             |
| <b>Supplementary Table 7</b>   | Analytic true positive rate in simulated structural variant detection using a 200 insert library                                            |
| <b>Supplementary Table 8</b>   | Analytic true positive rate in simulated structural variant detection using a 400 insert library                                            |
| <b>Supplementary Note</b>      | Additional results in simulation                                                                                                            |

*Note: Supplementary Tables 1 and 3 as well as Supplementary Software are available on the Nature Methods website.*

Supplementary Figure 1 The size of indels detectable by MAQ paired end Smith-Waterman alignment algorithm<sup>1</sup>.

Minus (-) represents deletions and plus (+) insertions. These results were obtained from one of our genome sequencing projects (data not shown).

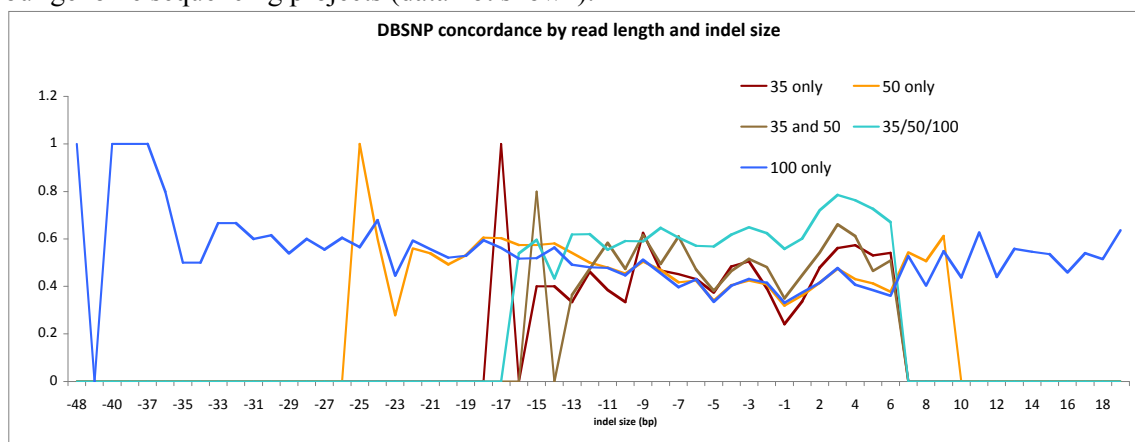

Supplementary Figure 2 The true positive rate (TPR) w.r.t. coverages in different size bins.

Results were obtained from simulation using 50 bp paired end reads with a 200 bp mean and 20 bp s.d insert size randomly produced from J. Craig Venter's chromosome 17 nucleotide sequence by MAQ-0.7.1 (- represents insertions and + deletions).

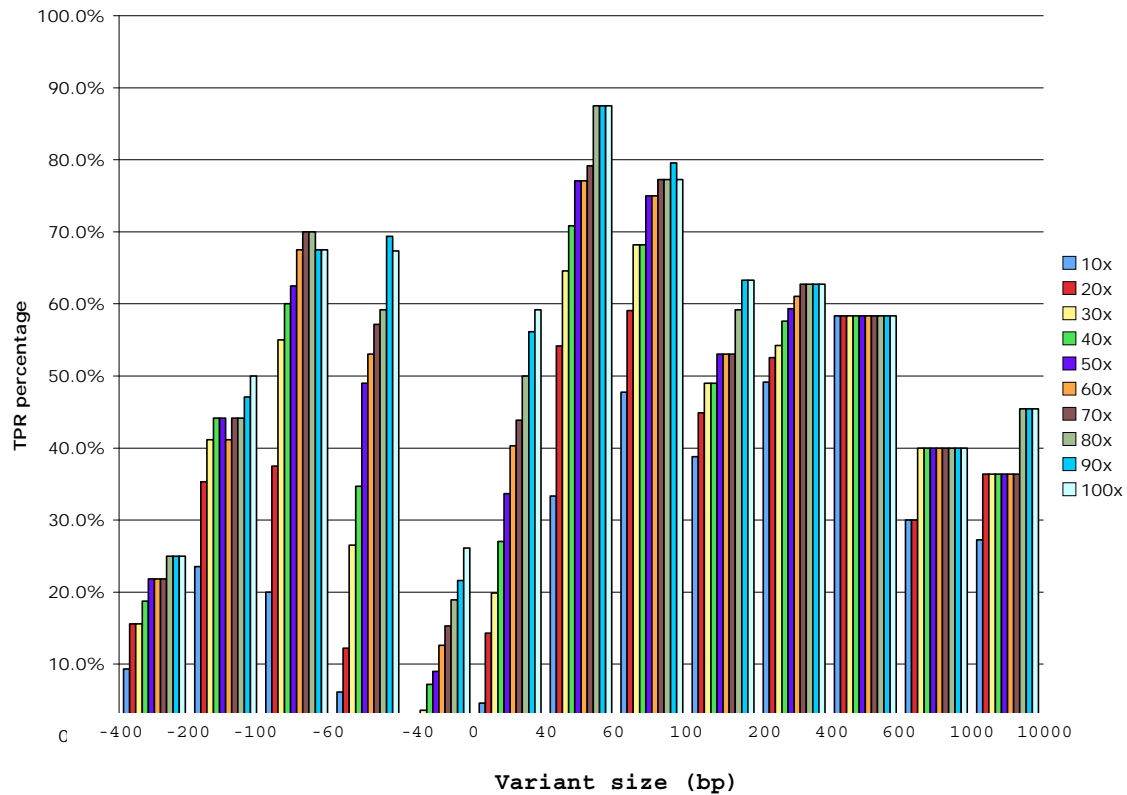

Supplementary Figure 3 Size and Breakpoint Accuracy of BreakDancerMax in simulation

(a) Correlation between the predicted and the true variant size.

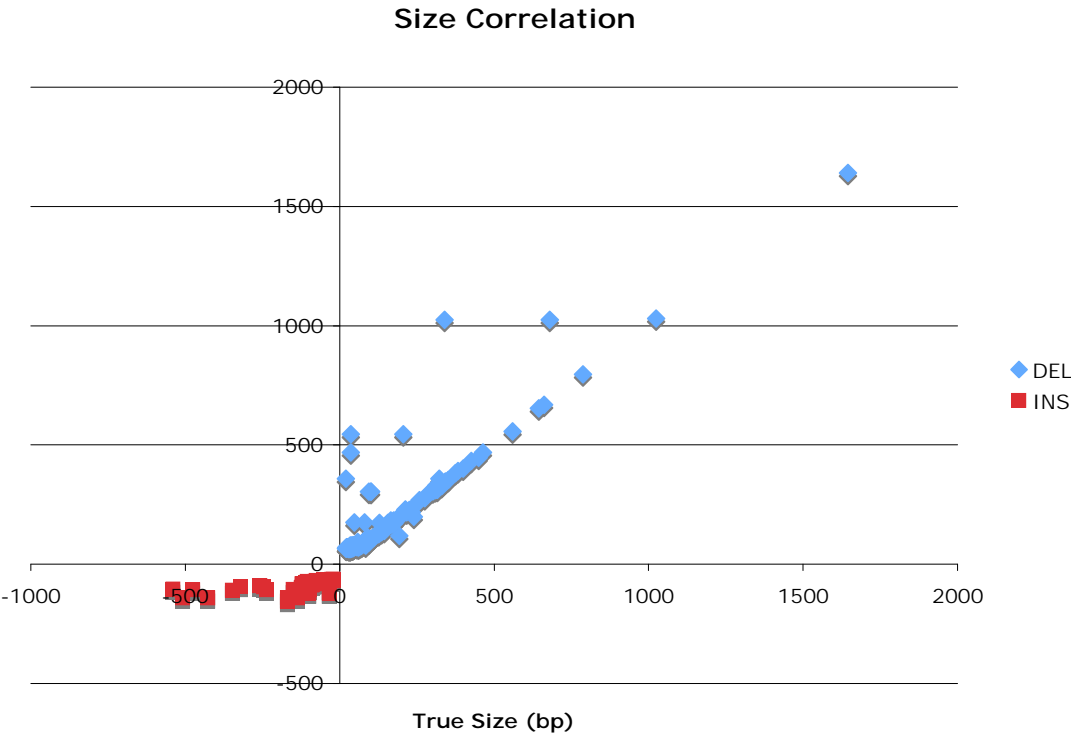

### Supplementary Figure 3

#### (b) Accuracy of the predicted variant boundaries.

The x axis represents the size of SV (+ for the deletions, - for the insertions). The y axis is the distance (in bp) between the predicted SV boundaries and the corresponding true breakpoints (- for the start, + for the end).

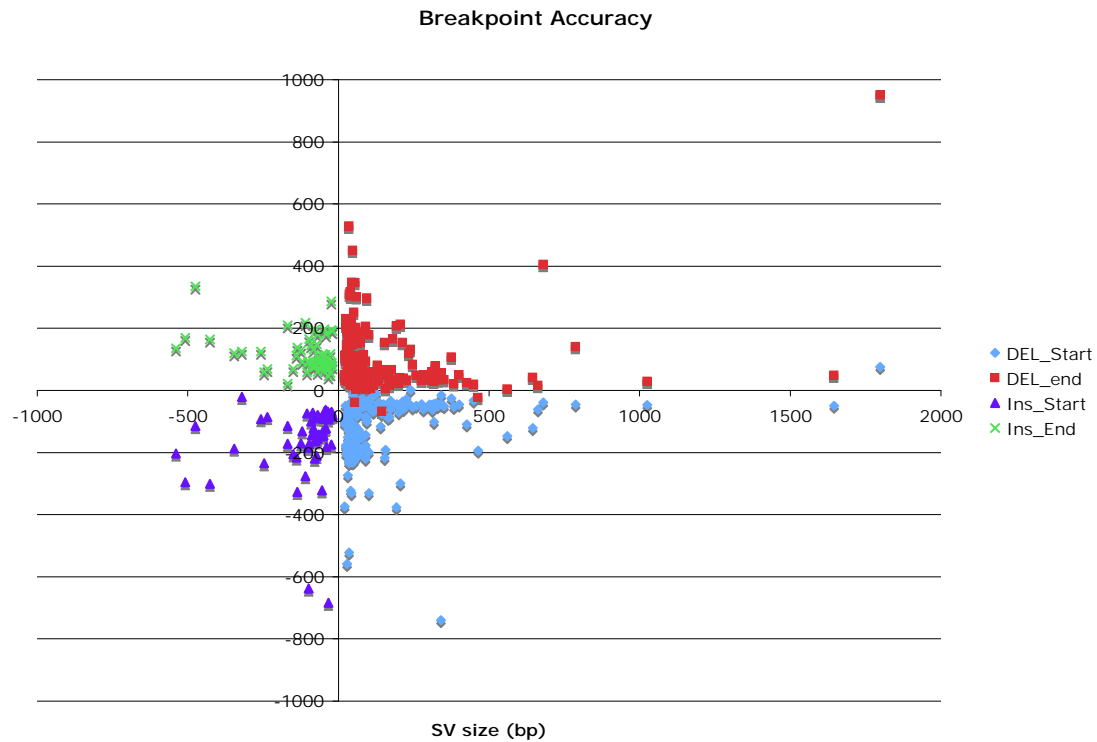

Supplementary Figure 4 Receiver operator characteristics (ROC) w.r.t. the number of anomalous read pairs ( $n$ ) and the confidence score ( $Q$ ).

The x axis and the y axis are the false positive rate (FPR) and the true positive rate (TPR) in simulated structural variation detection. The crosses represent the discrete tradeoffs achieved at  $n \geq 2, 3$ , and 4 and  $Q \geq 0$ . The colored lines represent the contiguous tradeoff achieved from applying additional confidence score threshold from  $Q \geq 0$  to  $Q \geq 90$  with  $n \geq 2$ .

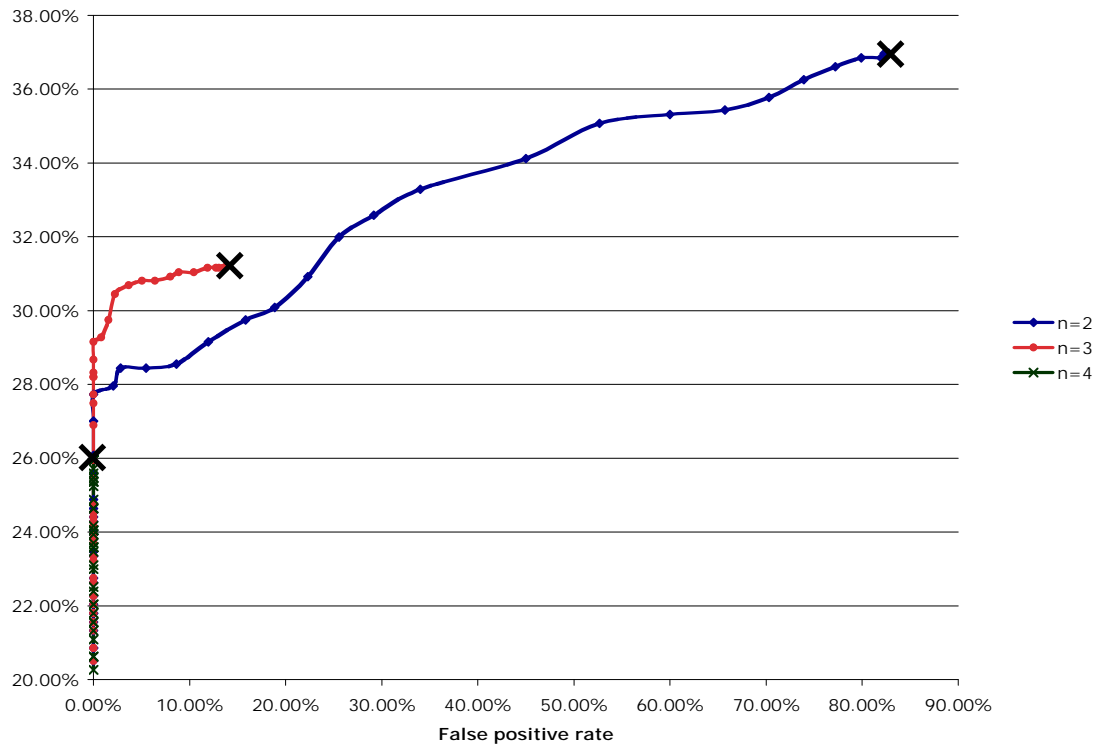

Supplementary Figure 5 The true positive rate (TPR) and the false positive rate (FPR) given various separation thresholds.

The x axis represents the separation distance threshold in unit of the standard deviation insert size. The y axis is the TPR and the FPR obtained under various conditions defined by the number of anomalous read pairs ( $n$ ) and the confidence scores ( $Q$ ). For thresholds ranging from two to four s.d. in insert size, culling based on confidence scores ( $Q \geq 30$ ) resulted in relatively steady TPRs and FPRs, while ARP-based culling ( $Q \geq 0$ ) led to substantially variable results.

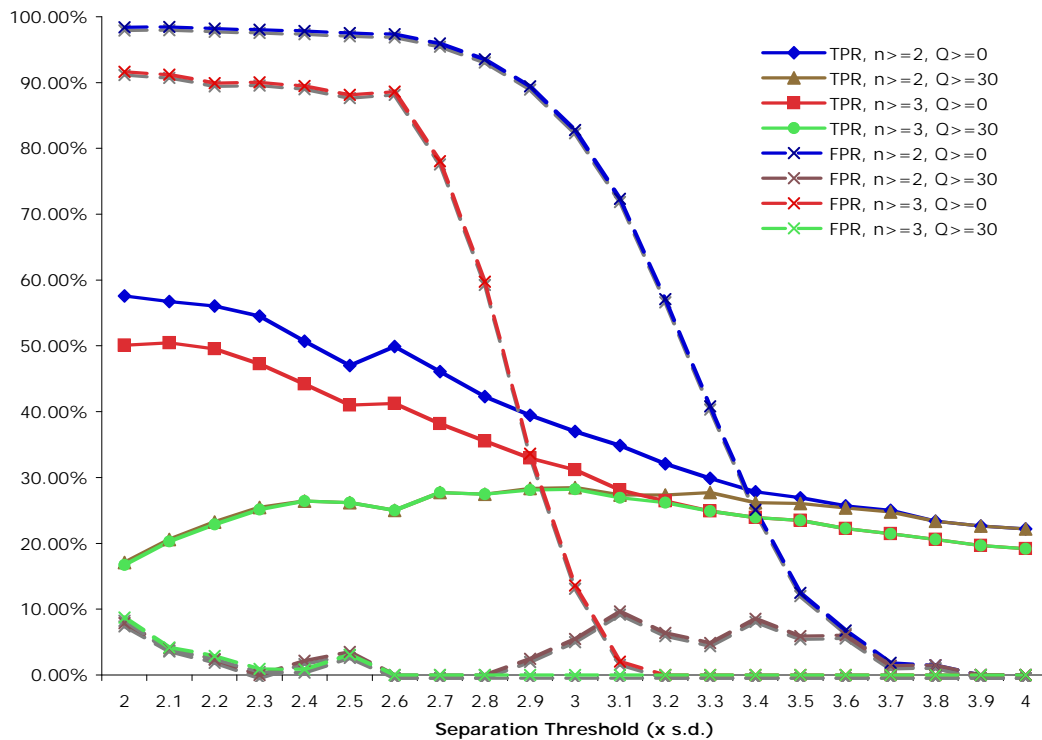

Supplementary Figure 6 The Receiver Characteristic (ROC) of BreakDancerMini at different threshold of  $D_{nn'}$ .

This curve was obtained via simulated structural variant detection using our synthetic Chromosome 17 data (MAQ mapping quality > 10). The false positive rate reduced to below 10% at  $D_{nn'} \geq 2.3$  before true positive rate started to drop quickly.

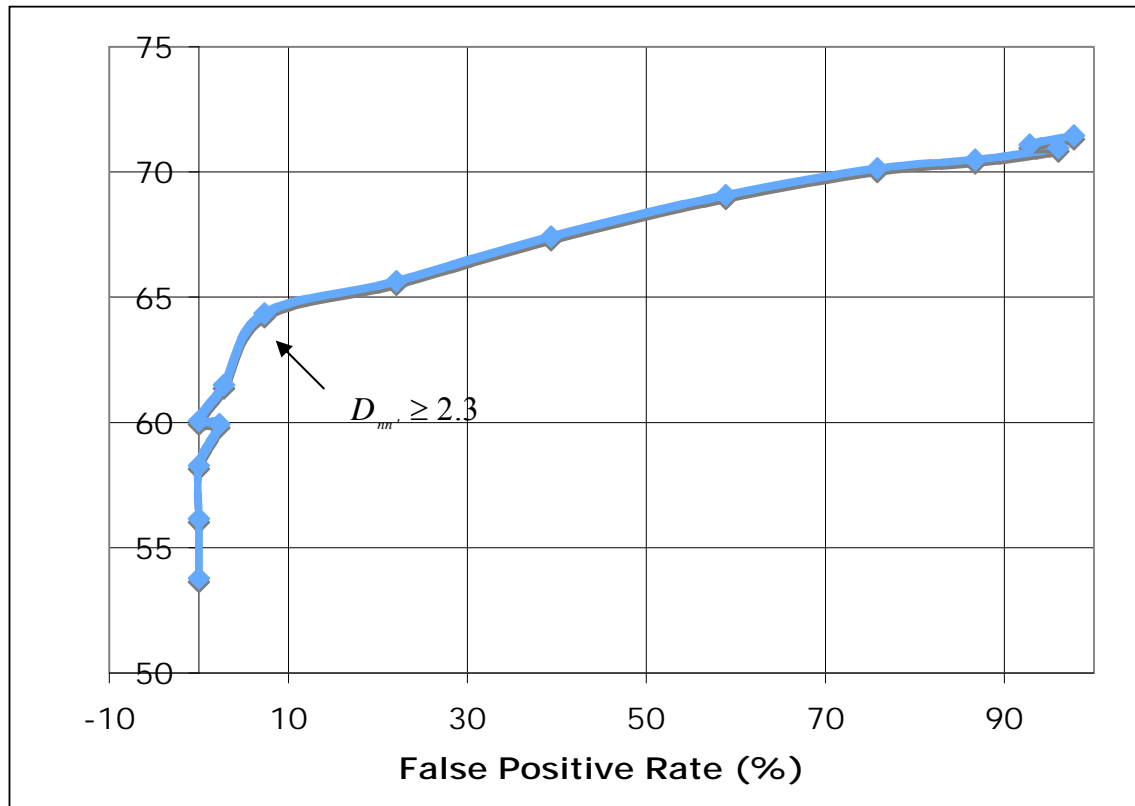

Supplementary Figure 7 Accuracy of variant size estimated by BreakDancerMini

(a) Correlation between the BreakDancerMini predicted size and the actual size for deletions between 10 to 300 bp on Venter's Chromosome 17 (Pearson's  $r=0.7812$ ).

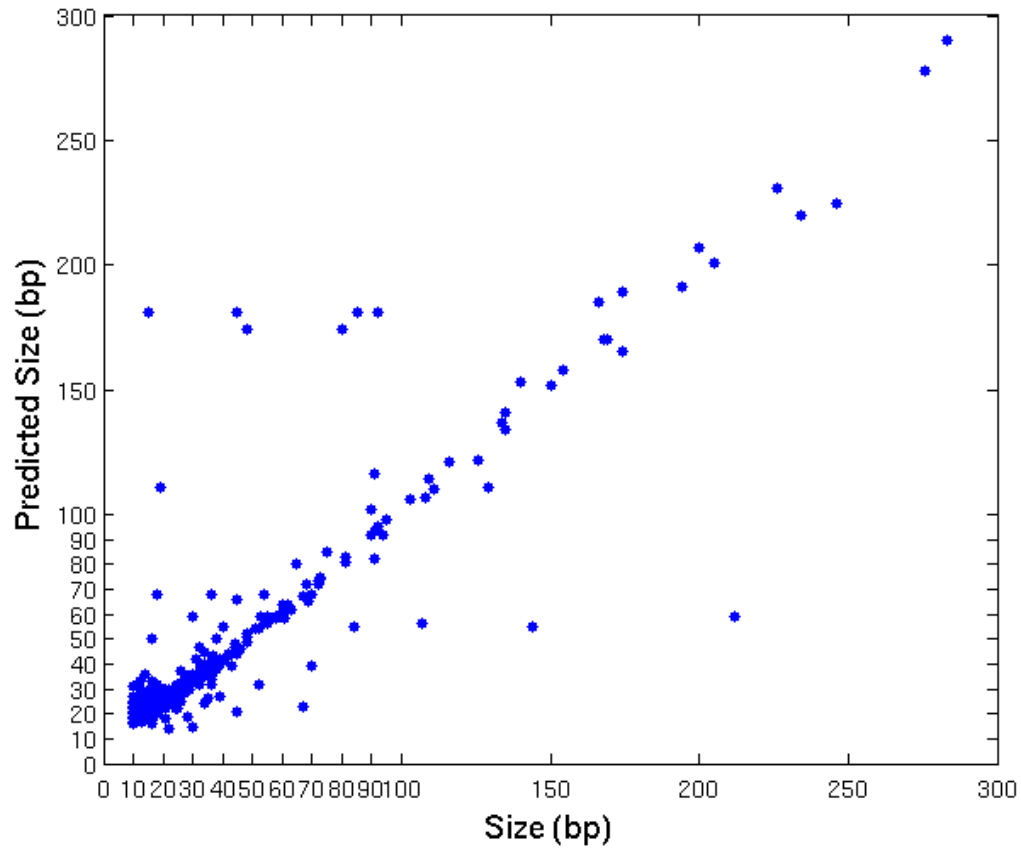

Supplementary Figure 7

**(b)** Correlation between the BreakDancerMini predicted size and the actual size for insertions between 10bp to 300bp on Venter's Chr 17 (Pearson's  $r=0.5897$ ).

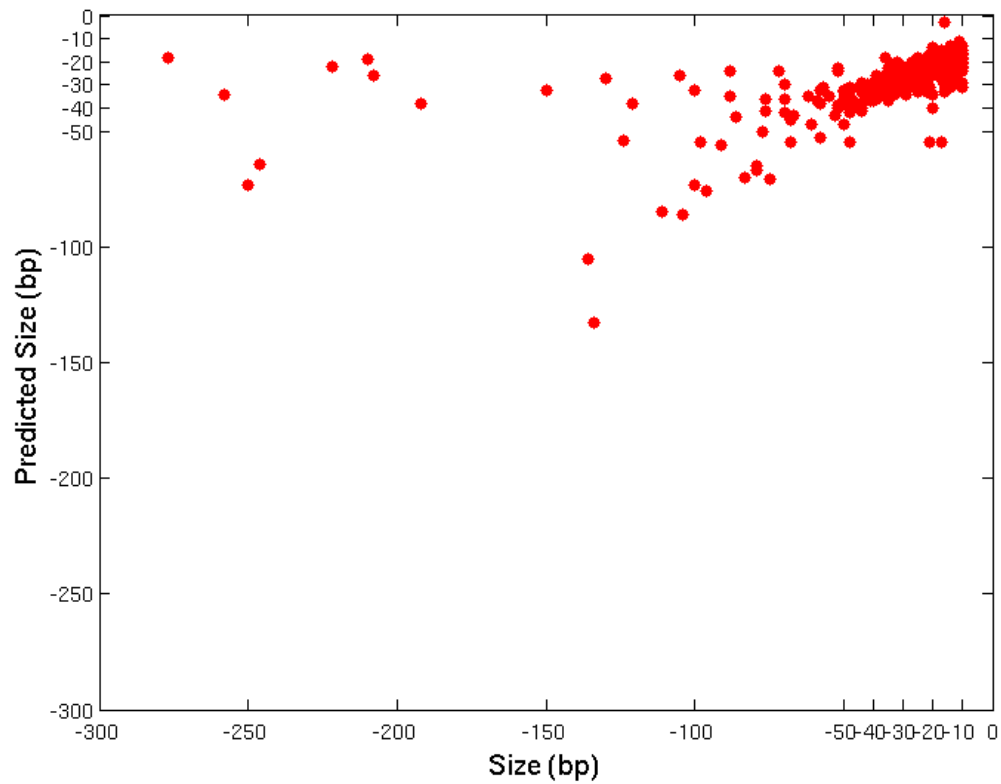

Supplementary Figure 8 Percent overlap between the AML structural variants and the DGV (v5) as functions of the confidence score or number of anomalous read pairs.

As we increased the confidence threshold, the number of putative variants dropped quickly and the percentage of deletions that overlap by 50% or more with any entry in the database of genomic variants (DGV, v. 5.0: <http://projects.tcag.ca/variation/>) increased rapidly.

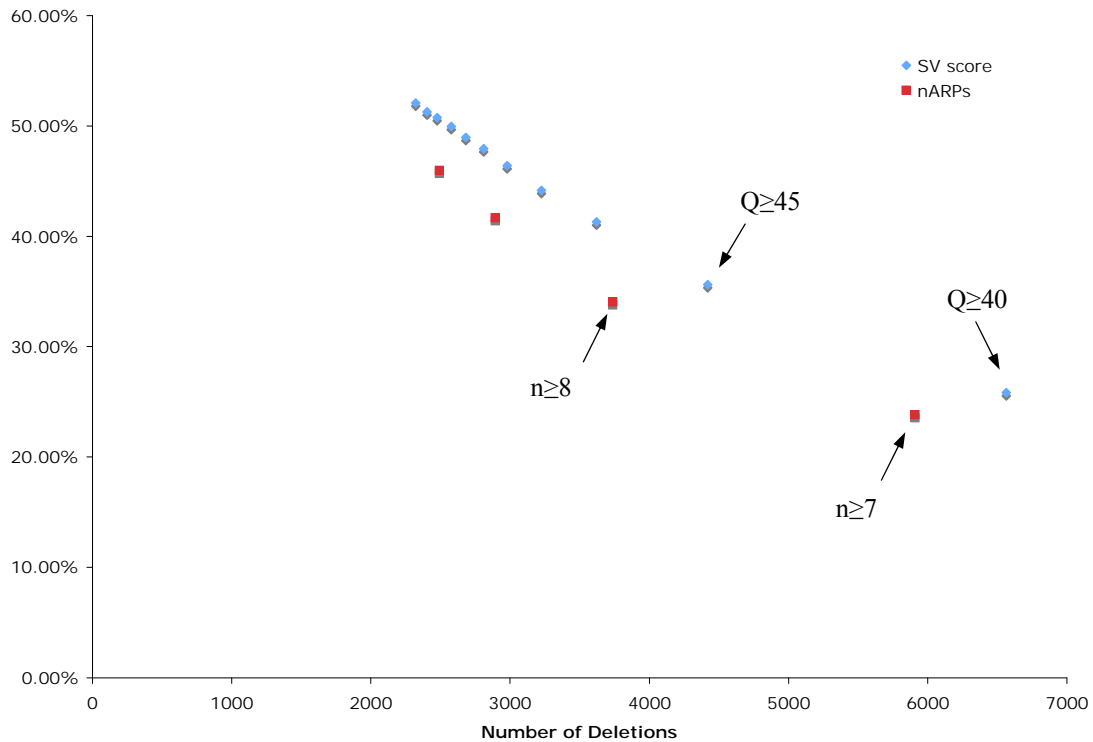

Supplementary Figure 9 AML validation result w.r.t variant size and confidence score

Del Val are deletions validated, Del !Val deletions not validated, Ins Val insertions validated, and Ins !Val insertions not validated.

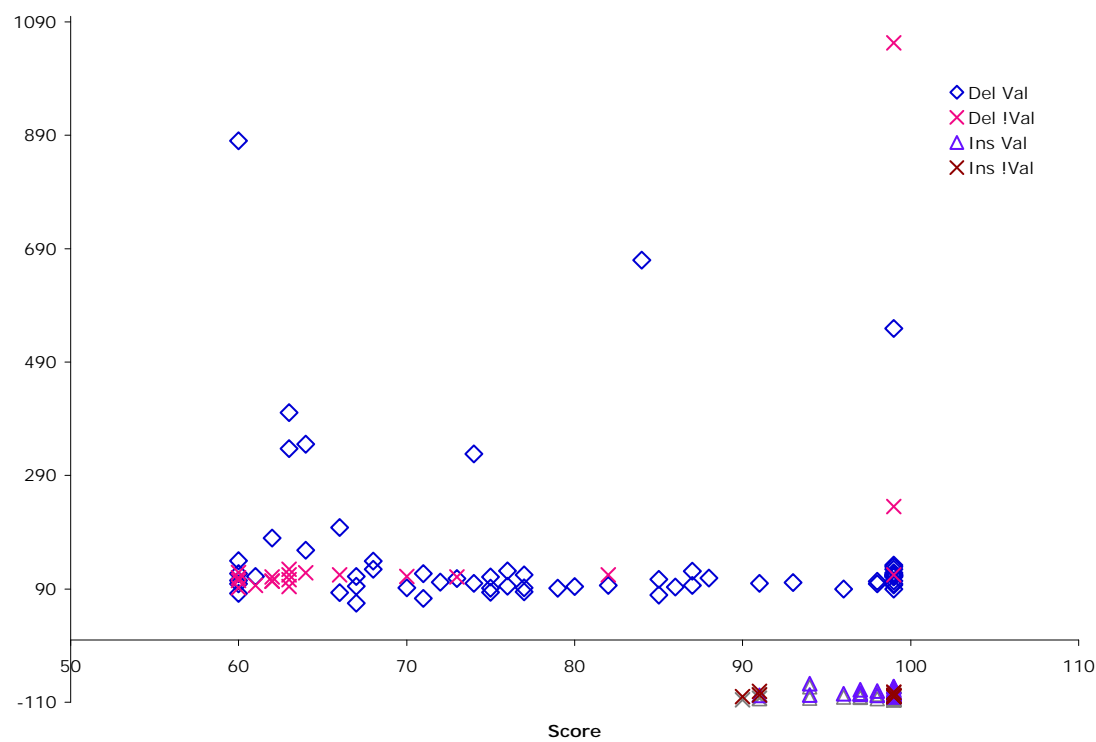

Supplementary Figure 10 Plots of identified inversions and intra-chromosomal translocations in the AML genome

Plots were produced by Yenta, a prototype structural variant visualization tool developed in house at Washington University Genome Center by David E. Larson et al.

(a) Inversion 1

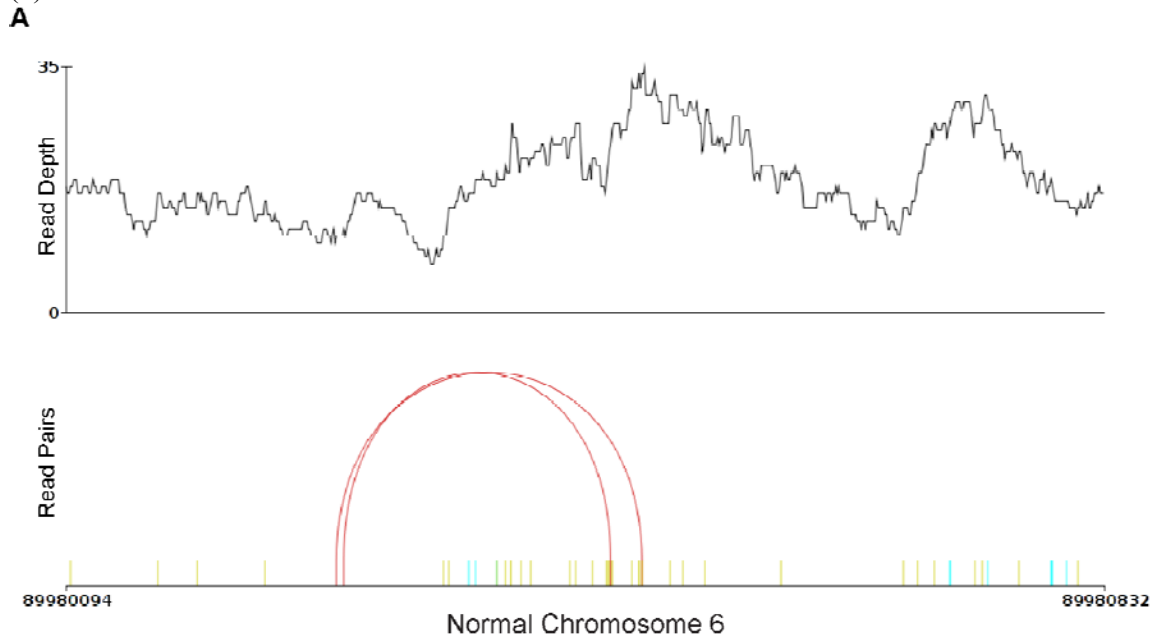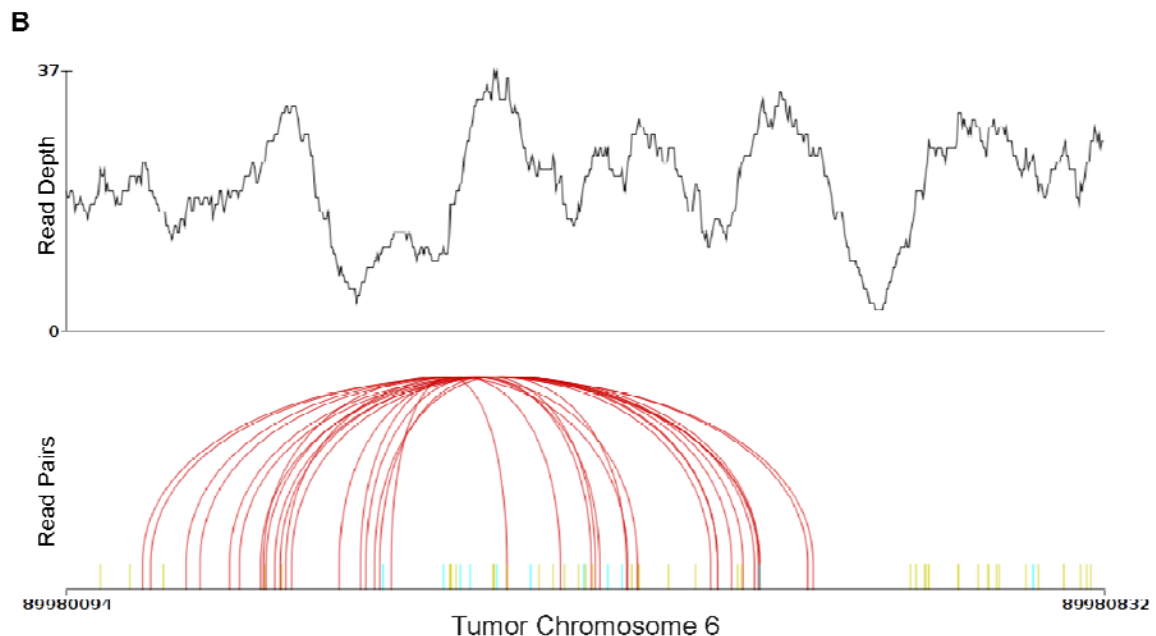

Supplementary Figure 10

(b) Inversion 2

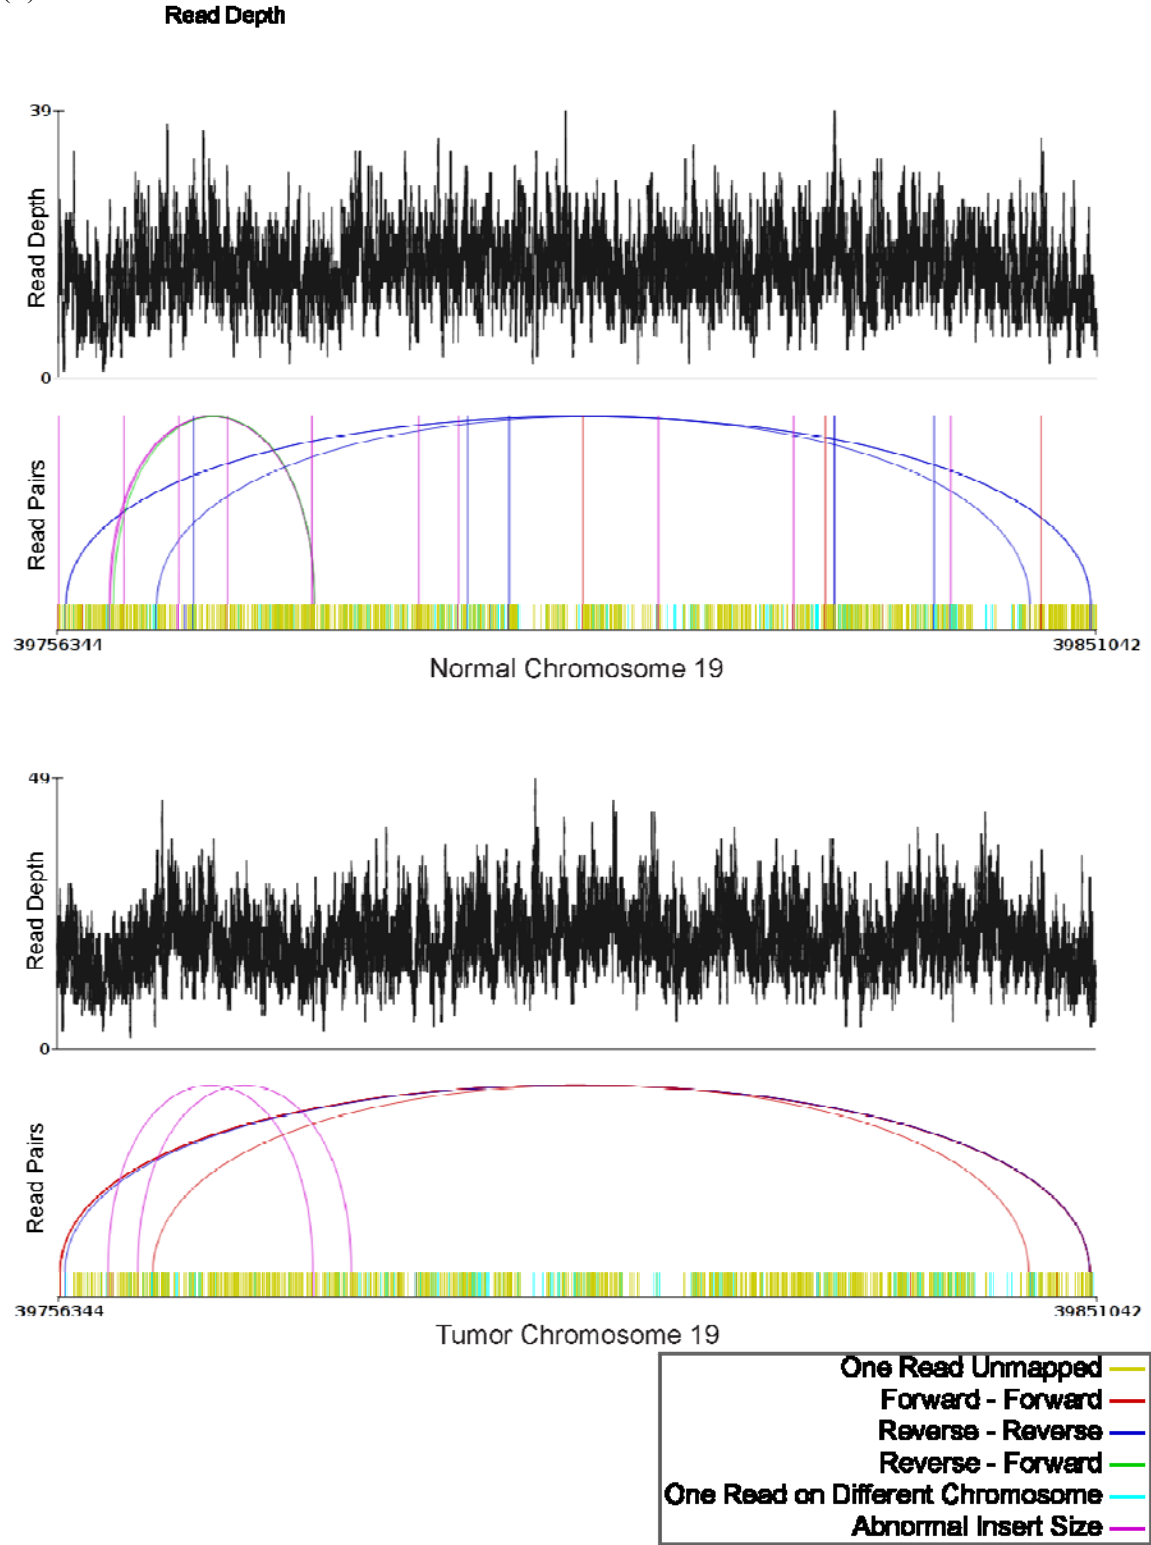

Supplementary Figure 10

(c) Inversion 3

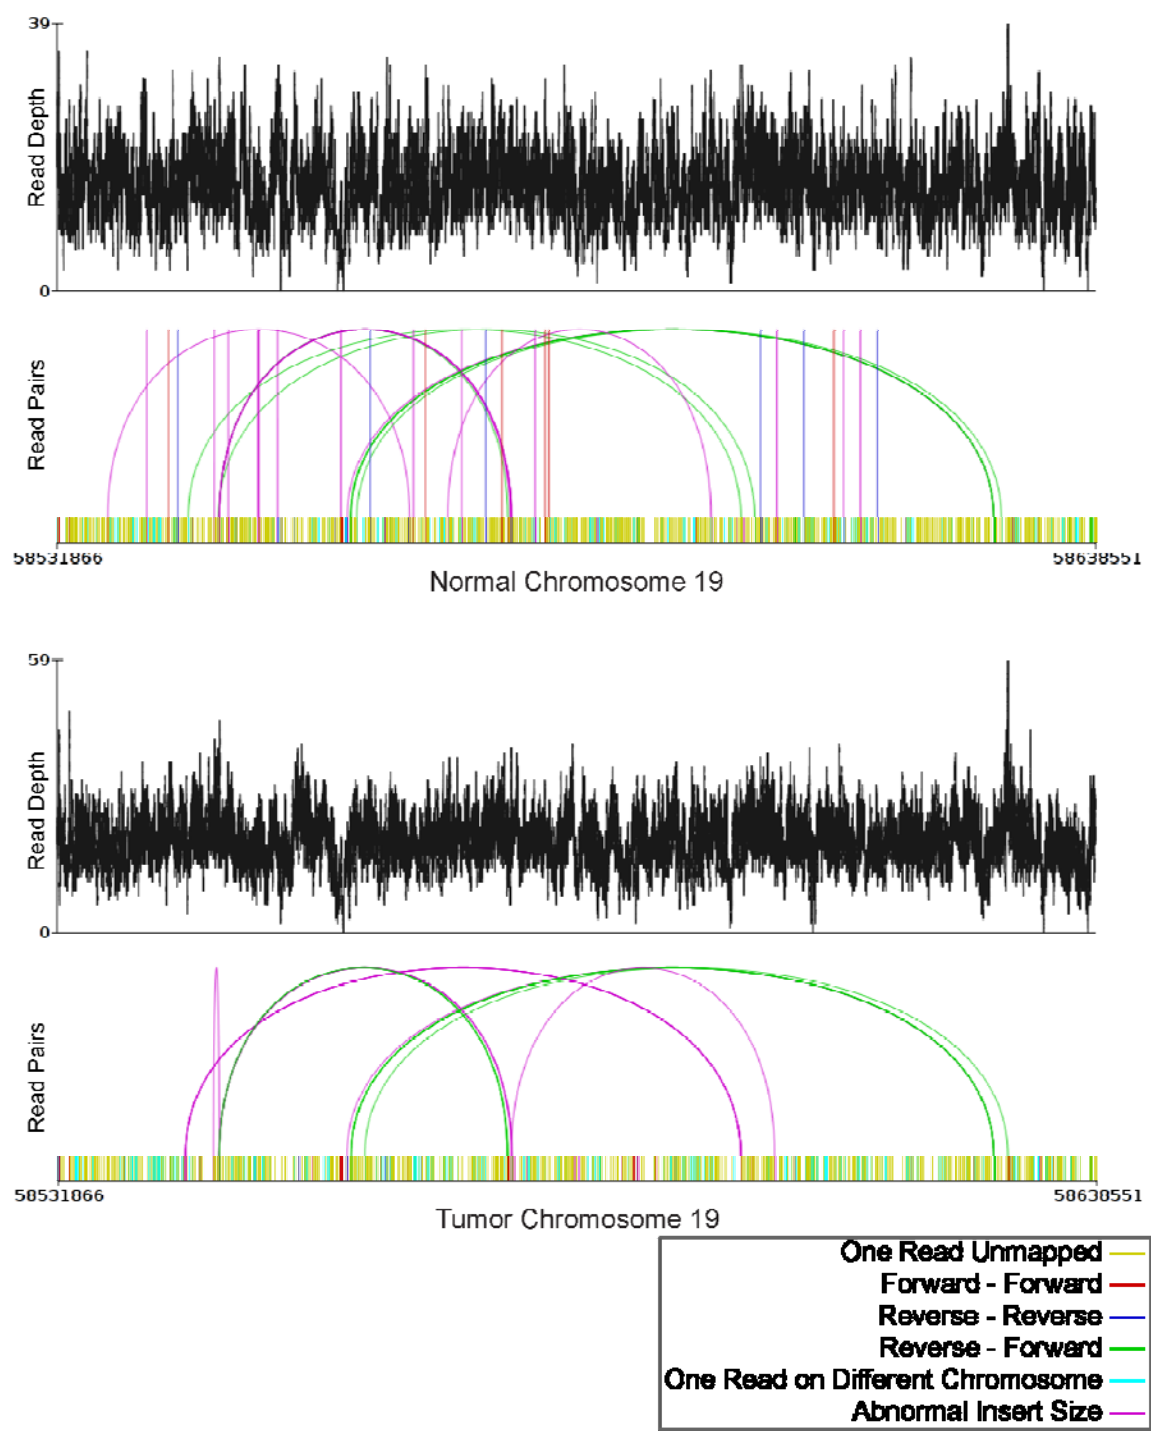

Supplementary Figure 10

(d) Inversion 4

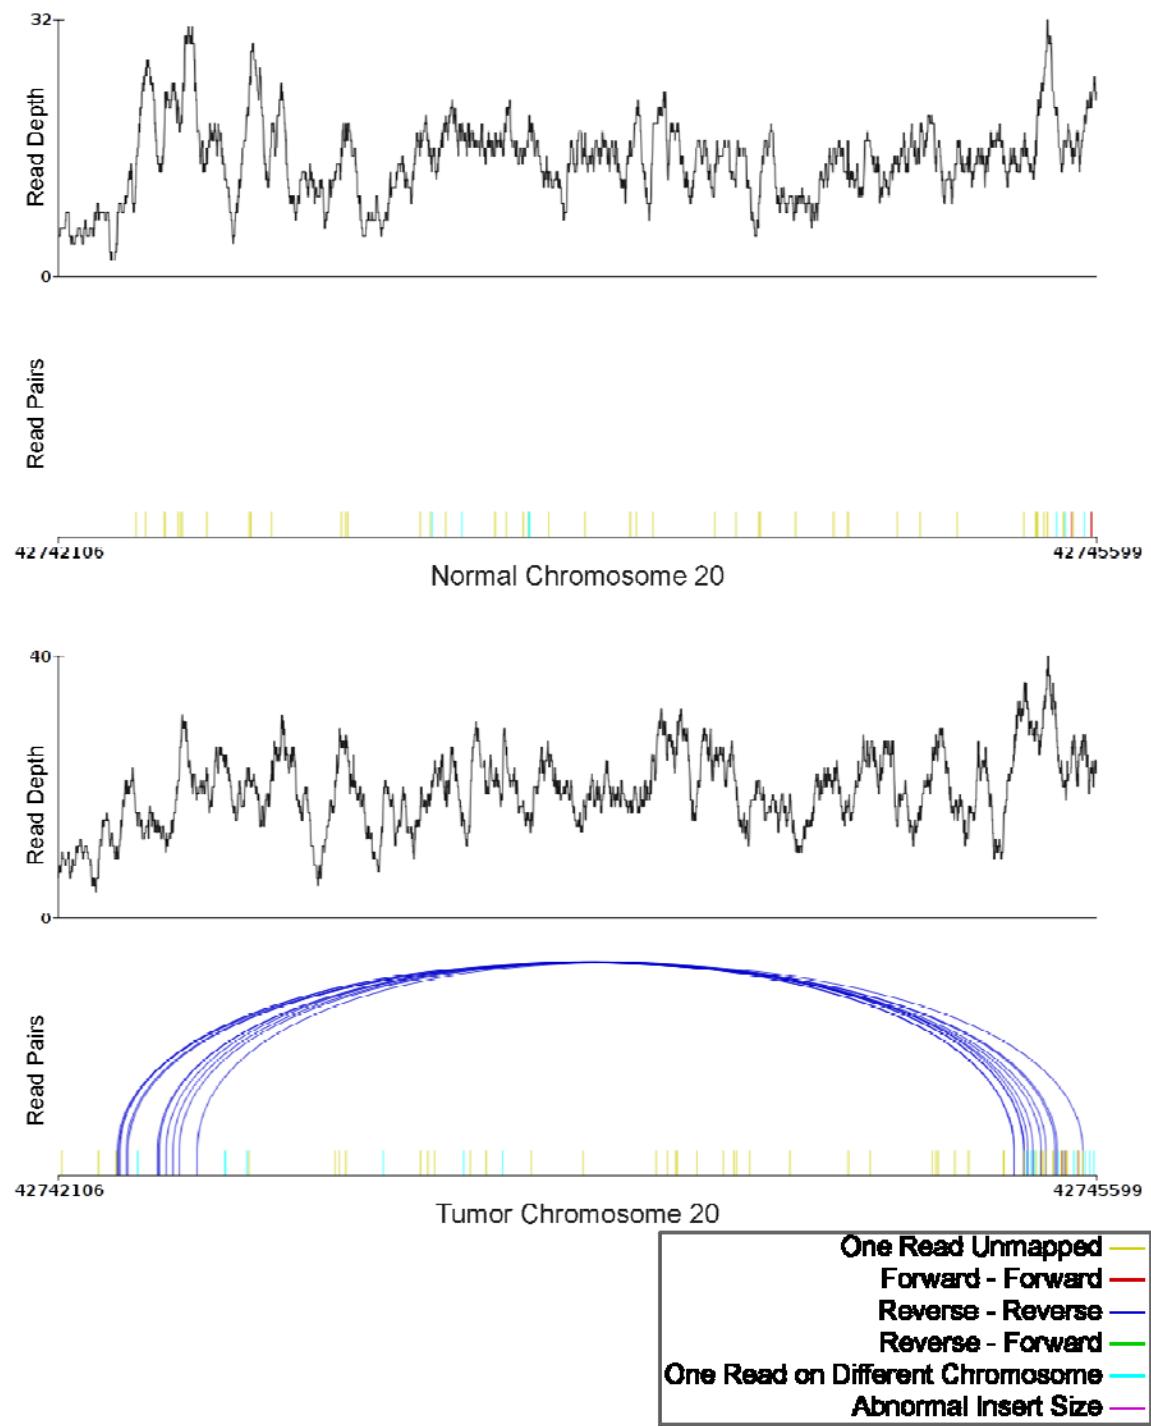

Supplementary Figure 10

(e) Intra-chromosomal translocation 1

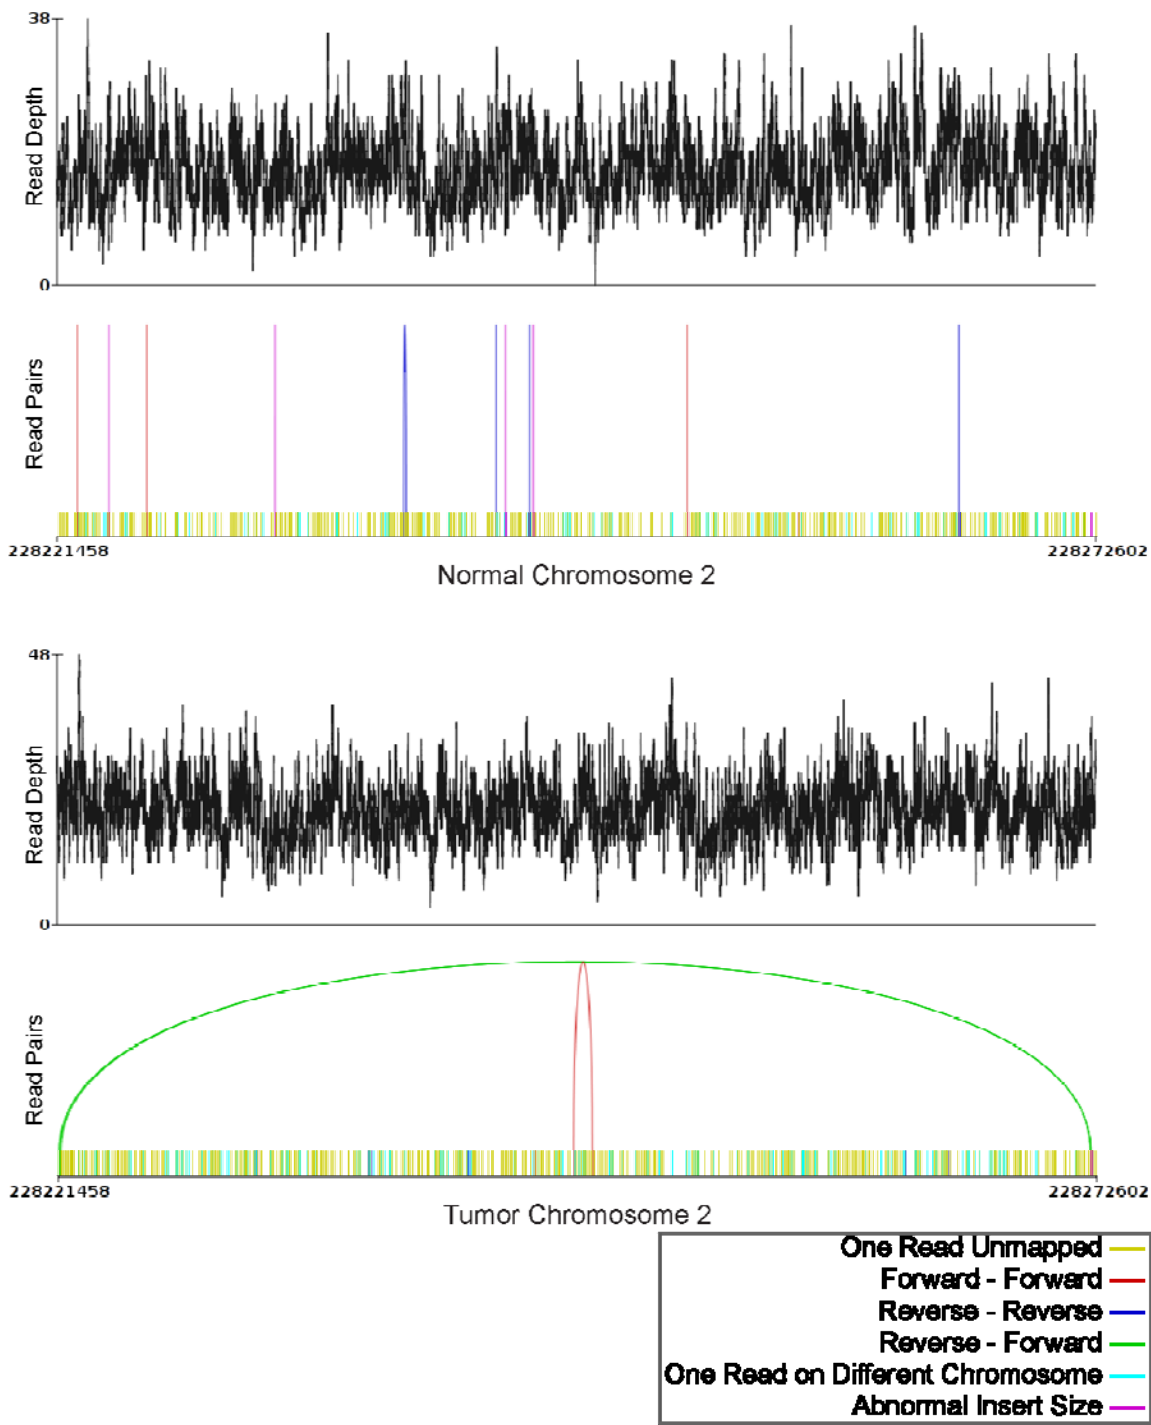

Supplementary Figure 10

(f) Intra-chromosomal translocation 2

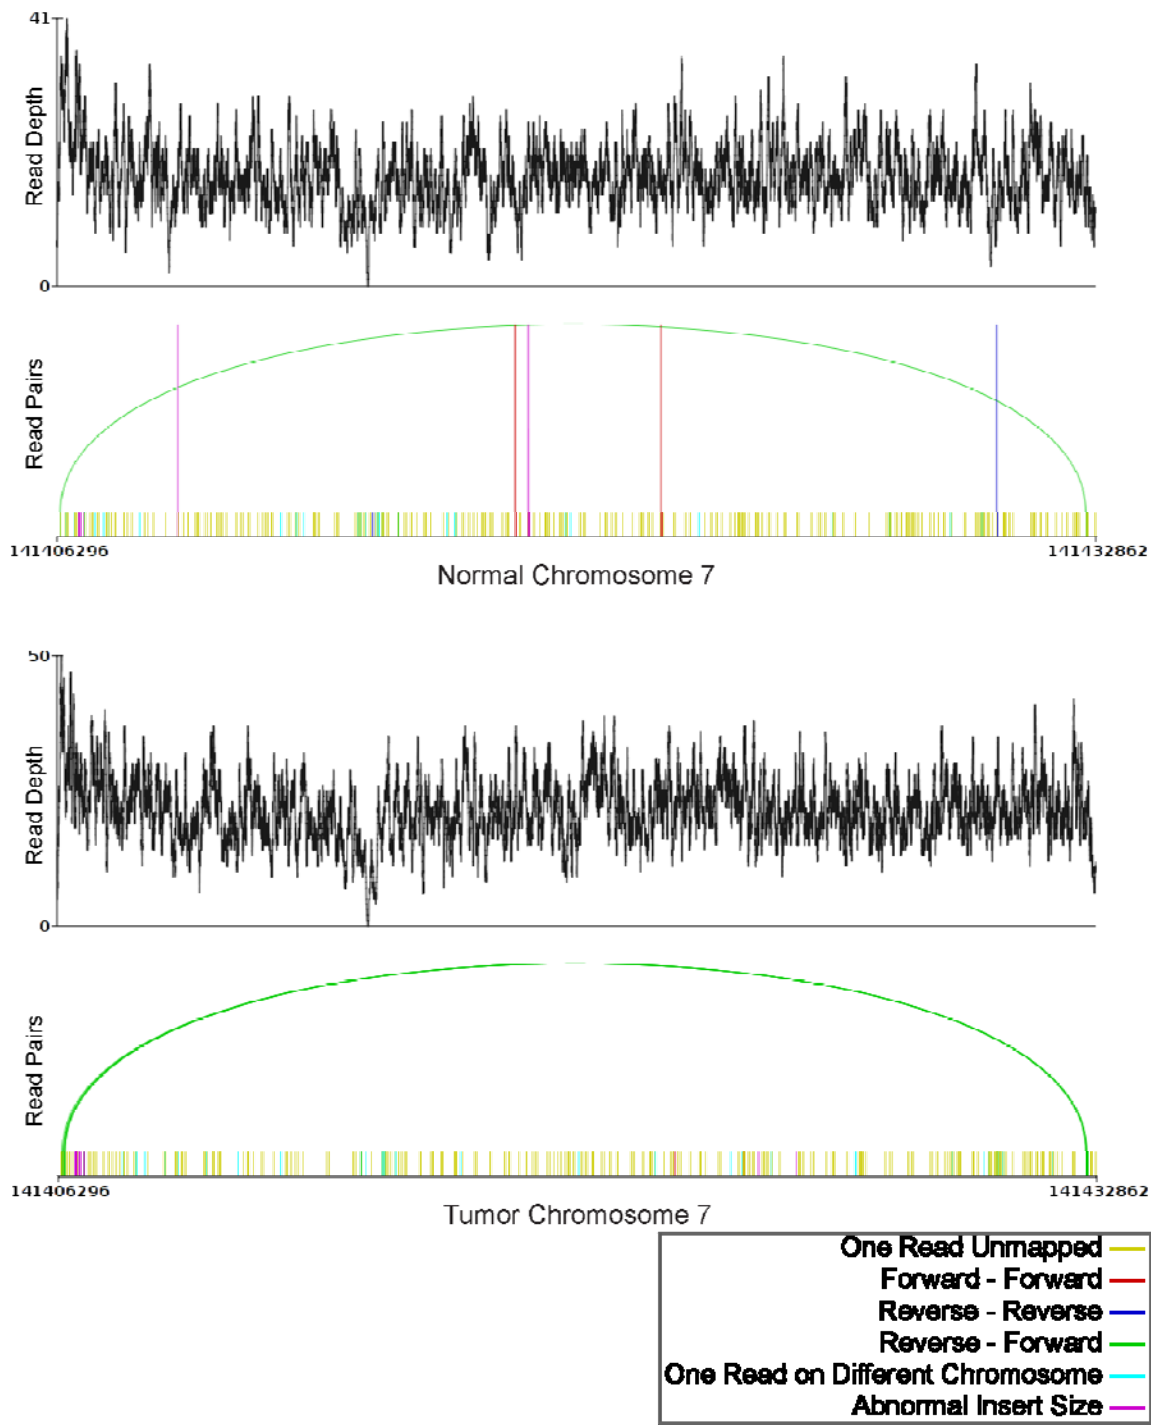

Supplementary Figure 11 The analytic true positive rate w.r.t. variant size and coverage

(a) Analytic true positive rates for the 20, 40, 60, 80, and 100 bp deletions using a 200 bp insert library (s.d. 20 bp and read length 50 bp) from 10 to 100  $\times$  physical coverage

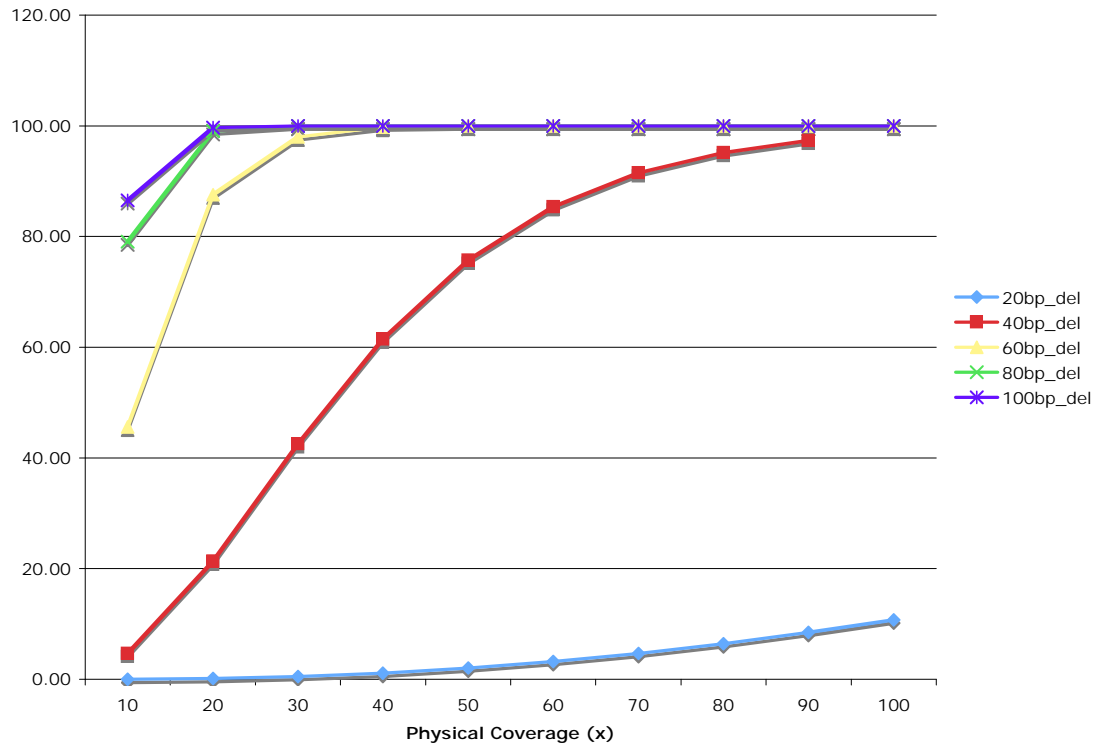

Supplementary Figure 11

**(b)** Analytic true positive rates for the 20, 40, 60, 80, and 100 bp insertions using a 200 bp insert library (s.d. 20 bp and read length 50 bp) from 10 to 100  $\times$  physical coverage

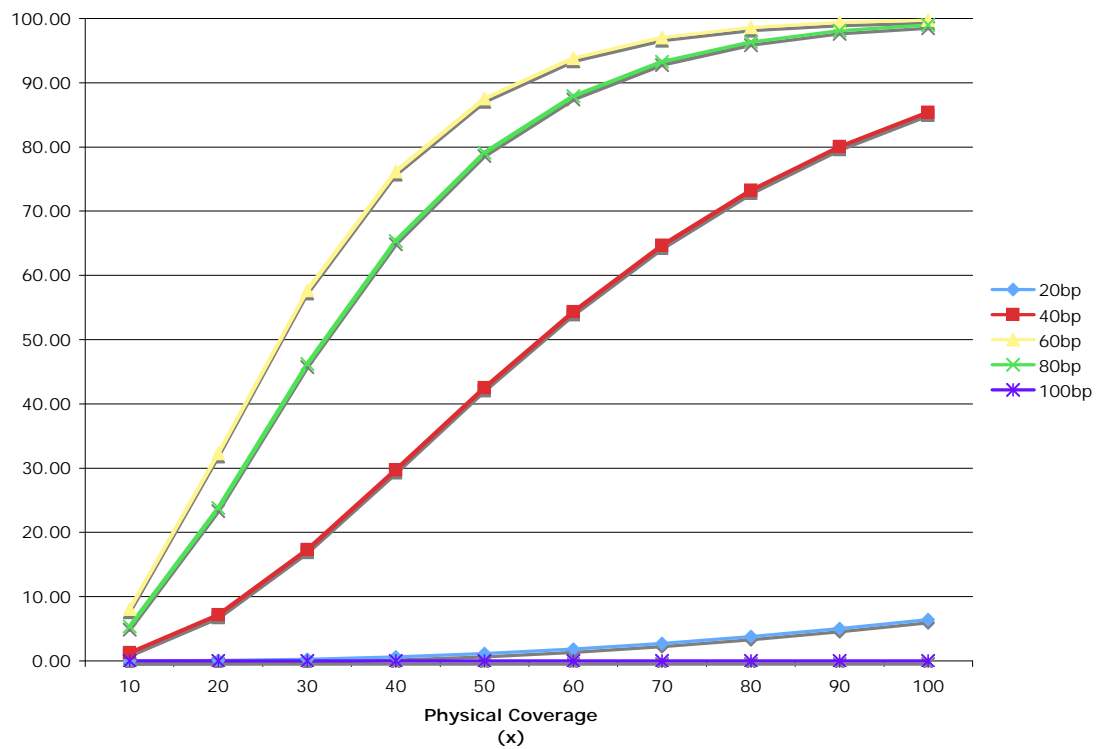

Supplementary Figure 12 The insert size distribution of the libraries in the AML project.

Plotted are insert size distributions from four tumor libraries (**a-d**) and two normal libraries (**e-f**). The x axis represents the insert size in bp, the y axis the probability density.

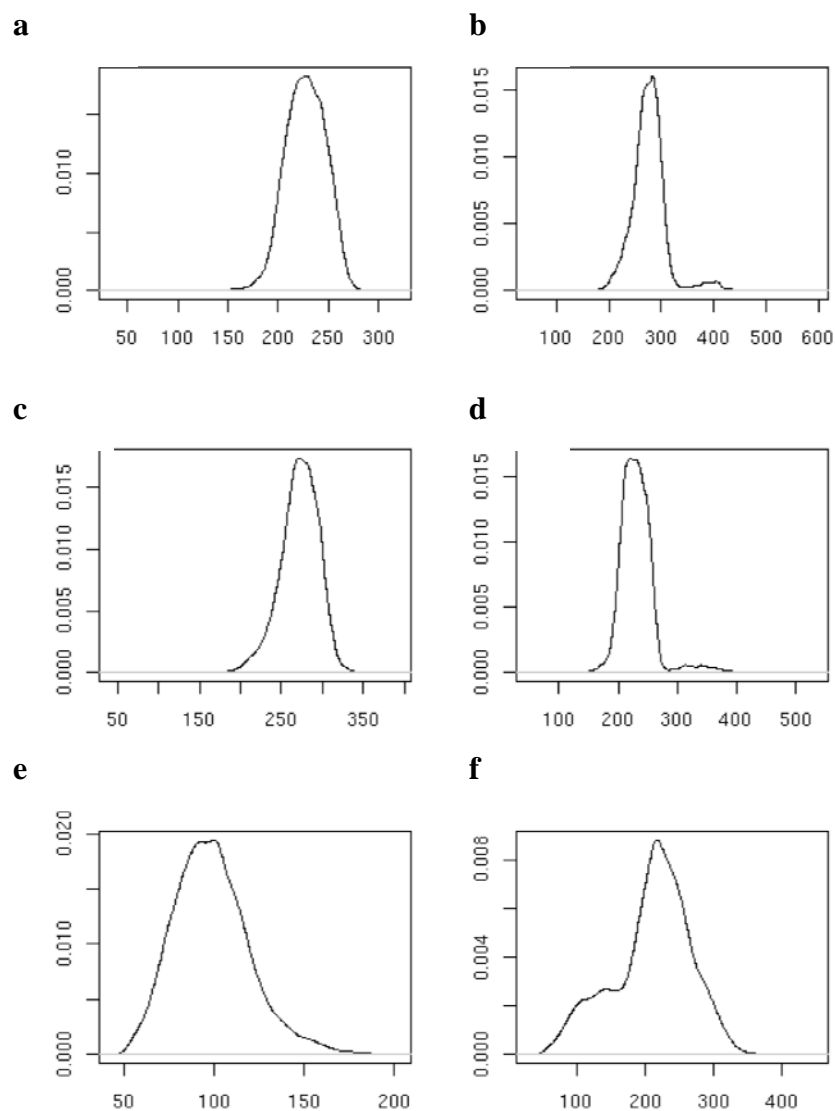

Supplementary Table 2 Number and type of structural variants detected by BreakDancerMax in the tumor-normal paired AML genome.

BreakDancerMax was run at a threshold of 3 s.d. and MAQ mapping quality > 35.

| Score | # SV    | # DEL   | Perc_DGV5 | # INS | # INV | # IRX |
|-------|---------|---------|-----------|-------|-------|-------|
| 0     | 1078733 | 1052246 | 0.43%     | 15979 | 9378  | 1130  |
| 10    | 898114  | 871627  | 0.50%     | 15979 | 9378  | 1130  |
| 20    | 218800  | 196387  | 1.84%     | 12200 | 9083  | 1130  |
| 30    | 46060   | 29832   | 8.71%     | 9952  | 5169  | 1107  |
| 40    | 18762   | 7267    | 25.85%    | 5904  | 4510  | 1081  |
| 50    | 10986   | 3934    | 41.29%    | 2836  | 3158  | 1058  |
| 60    | 7087    | 3170    | 46.42%    | 1570  | 1382  | 965   |
| 70    | 5499    | 2835    | 48.96%    | 1212  | 644   | 808   |
| 80    | 4890    | 2608    | 50.77%    | 1052  | 508   | 722   |
| 90    | 4470    | 2437    | 52.07%    | 935   | 438   | 660   |

Supplementary Table 4 The paired end libraries used for the structural variation detection of the 1000 genomes trio individuals.

| Library                        | Mean (bp)  | SD (bp)  | AvgReadLen (bp) | Sample ID | Sequence Depth (x) | Physical Coverage (x) |
|--------------------------------|------------|----------|-----------------|-----------|--------------------|-----------------------|
| NA12878_libSC_1.1.map          | 130.669466 | 30.69132 | 36              | NA12878   | 2.956              | 5.364707521           |
| NA12878_libSC_2.1.map          | 173.370426 | 42.05891 | 36              | NA12878   | 4.309              | 10.37573841           |
| NA12891_libSC_1.1.map          | 127.291342 | 26.62561 | 36              | NA12891   | 5.048              | 8.924537422           |
| NA12891_libSC_2.1.map          | 143.931114 | 39.65158 | 35.880778       | NA12891   | 2.407              | 4.827685055           |
| NA12892_libSC_1.1.map          | 139.137373 | 38.50202 | 35.838347       | NA12892   | 3.415              | 6.629130088           |
| NA12892_libSC_2.1.map          | 150.54879  | 37.79393 | 35.888298       | NA12892   | 4.331              | 9.084114403           |
| H_IJ-NA19240-071608a.rmdup.map | 273.12     | 22.79    | 35.26           | NA19240   | 5.53               | 21.41737947           |
| H_IJ-NA19240-042108a.rmdup.map | 264.85     | 41.75    | 37.03           | NA19240   | 13.372             | 47.82033756           |
| H_IJ-NA19239-071608a.rmdup.map | 300        | 30       | 35.49           | NA19239   | 7.854              | 33.19526627           |
| H_IJ-NA19239-042108a.rmdup.map | 230        | 30       | 35.57           | NA19239   | 9.547              | 30.8660388            |
| H_IJ-NA19238-071608a.rmdup.map | 274.76     | 50.89    | 35.38           | NA19238   | 5.391              | 20.93317072           |
| H_IJ-NA19238-042108a.rmdup.map | 240.85     | 38.63    | 35.54           | NA19238   | 9.036              | 30.61790377           |

# Supplementary Table 5 Deletions detected by BreakDancerMax on chromosome 5 of NA12878.

Deletions predicted by BreakDancerMax (BD) on chromosome 5 of NA12878 were compared (50% overlap in interval) with those predicted in other samples in the CEU trio (NA12891 and NA12892), in the YRI trio (NA19240, NA19238, and NA19239), or identified using fosmid ESP<sup>2</sup>, array CGH, and SNP arrays<sup>3</sup>. Results in the upper panel were obtained from the individual analysis, those in the lower panel from the pooled analysis, and those in the four columns using various s.d. and mapping quality (q) thresholds.

| Independent | 4SD, q>=35 |     |        |        | 4SD, q>=10 |        |     |        | 3SD, q>=35 |        |        |     | 3SD, q>=10 |        |        |        |     |        |        |        |        |
|-------------|------------|-----|--------|--------|------------|--------|-----|--------|------------|--------|--------|-----|------------|--------|--------|--------|-----|--------|--------|--------|--------|
|             | overlap    | BD  | BD     | BD     | overlap    | BD     | BD  | BD     | overlap    | BD     | BD     | BD  | overlap    | BD     | BD     | BD     |     |        |        |        |        |
| NA12891     | 88         | 120 | 73.33% | 125    | 70.40%     | 115    | 160 | 71.88% | 171        | 67.25% | 98     | 140 | 70.00%     | 140    | 70.00% | 126    | 179 | 70.39% | 200    | 63.00% |        |
| NA12892     | 98         | 133 | 73.68% | 125    | 78.40%     | 126    | 163 | 77.30% | 171        | 73.68% | 103    | 144 | 71.53%     | 140    | 73.57% | 124    | 171 | 72.51% | 200    | 62.00% |        |
| NA19240     | 88         | 246 | 35.77% | 125    | 70.40%     | 114    | 308 | 37.01% | 171        | 66.67% | 97     | 309 | 31.39%     | 140    | 69.29% | 120    | 375 | 32.00% | 200    | 60.00% |        |
| NA19238     | 87         | 164 | 53.05% | 125    | 69.60%     | 108    | 208 | 51.92% | 171        | 63.16% | 90     | 201 | 44.78%     | 140    | 64.29% | 112    | 249 | 44.98% | 200    | 56.00% |        |
| NA19239     | 86         | 235 | 36.60% | 125    | 68.80%     | 115    | 309 | 37.22% | 171        | 67.25% | 98     | 309 | 31.72%     | 140    | 70.00% | 130    | 403 | 32.26% | 200    | 65.00% |        |
| FOSMID_ESP  | 2          | 7   | 28.57% | 125    | 1.60%      | 3      | 7   | 42.86% | 171        | 1.75%  | 2      | 7   | 28.57%     | 140    | 1.43%  | 3      | 7   | 42.86% | 200    | 1.50%  |        |
| SeqDel      | 1          | 4   | 25.00% | 125    | 0.80%      | 2      | 4   | 50.00% | 171        | 1.17%  | 1      | 4   | 25.00%     | 140    | 0.71%  | 2      | 4   | 50.00% | 200    | 1.00%  |        |
| DGV         | 79         | 722 | 10.94% | 125    | 63.20%     | 93     | 722 | 12.88% | 171        | 54.39% | 81     | 722 | 11.22%     | 140    | 57.86% | 99     | 722 | 13.71% | 200    | 49.50% |        |
| WTSIaCGH    | 6          | 25  | 24.00% | 125    | 4.80%      | 9      | 25  | 36.00% | 171        | 5.26%  | 6      | 25  | 24.00%     | 140    | 4.29%  | 9      | 25  | 36.00% | 200    | 4.50%  |        |
| Affy6       | 4          | 14  | 28.57% | 125    | 3.20%      | 6      | 14  | 42.86% | 171        | 3.51%  | 4      | 14  | 28.57%     | 140    | 2.86%  | 6      | 14  | 42.86% | 200    | 3.00%  |        |
| Nimblegen   | 8          | 23  | 34.78% | 125    | 6.40%      | 10     | 23  | 43.48% | 171        | 5.85%  | 8      | 23  | 34.78%     | 140    | 5.71%  | 10     | 23  | 43.48% | 200    | 5.00%  |        |
| Pooled      | NA12891    | 122 | 146    | 83.56% | 161        | 75.78% | 171 | 209    | 81.82%     | 220    | 77.73% | 137 | 170        | 80.59% | 184    | 74.46% | 210 | 258    | 81.40% | 270    | 77.78% |
|             | NA12892    | 132 | 152    | 86.84% | 161        | 81.99% | 175 | 199    | 87.94%     | 220    | 79.55% | 146 | 180        | 81.11% | 184    | 79.35% | 202 | 241    | 83.82% | 270    | 74.81% |
|             | NA19240    | 110 | 302    | 36.42% | 161        | 68.32% | 142 | 376    | 37.77%     | 220    | 64.55% | 126 | 427        | 29.51% | 184    | 68.48% | 165 | 533    | 30.96% | 270    | 61.11% |
|             | NA19238    | 108 | 220    | 49.09% | 161        | 67.08% | 133 | 286    | 46.50%     | 220    | 60.45% | 121 | 277        | 43.68% | 184    | 65.76% | 151 | 365    | 41.37% | 270    | 55.93% |
|             | NA19239    | 117 | 323    | 36.22% | 161        | 72.67% | 148 | 408    | 36.27%     | 220    | 67.27% | 134 | 430        | 31.16% | 184    | 72.83% | 173 | 545    | 31.74% | 270    | 64.07% |
|             | FOSMID_ESP | 3   | 7      | 42.86% | 161        | 1.86%  | 4   | 7      | 57.14%     | 220    | 1.82%  | 3   | 7          | 42.86% | 184    | 1.63%  | 4   | 7      | 57.14% | 270    | 1.48%  |
|             | SeqDel     | 2   | 4      | 50.00% | 161        | 1.24%  | 3   | 4      | 75.00%     | 220    | 1.36%  | 2   | 4          | 50.00% | 184    | 1.09%  | 3   | 4      | 75.00% | 270    | 1.11%  |
|             | DGV        | 97  | 722    | 13.43% | 161        | 60.25% | 110 | 722    | 15.24%     | 220    | 50.00% | 102 | 722        | 14.13% | 184    | 55.43% | 119 | 722    | 16.48% | 270    | 44.07% |
|             | WTSIaCGH   | 9   | 25     | 36.00% | 161        | 5.59%  | 10  | 25     | 40.00%     | 220    | 4.55%  | 9   | 25         | 36.00% | 184    | 4.89%  | 10  | 25     | 40.00% | 270    | 3.70%  |
|             | Affy6      | 5   | 14     | 35.71% | 161        | 3.11%  | 7   | 14     | 50.00%     | 220    | 3.18%  | 5   | 14         | 35.71% | 184    | 2.72%  | 7   | 14     | 50.00% | 270    | 2.59%  |
|             | Nimblegen  | 9   | 23     | 39.13% | 161        | 5.59%  | 11  | 23     | 47.83%     | 220    | 5.00%  | 9   | 23         | 39.13% | 184    | 4.89%  | 11  | 23     | 47.83% | 270    | 4.07%  |

FOSMID ESP, validated deletions discovered through FOSMID end sequence profiling, Kidd et al. Nature 08  
SeqDel, completely sequenced deletions identified from FOSMID\_ESP  
DGV, database of Genomic Variants  
WTSIaCGH, CNV calls made by WTSI based on 2.1M Nimblegen array CGH, half of the calls are from the CNVs of the reference  
Affy6, CNV calls made by Mccarroll et al. 2008 using Array 6.0  
Nimblegen, deletion calls made by Sebat group using Nimblegen arrays.

# Supplementary Table 6 Deletions detected by BreakDancerMax on chromosome 5 of NA19240.

Deletions predicted by BreakDancerMax (BD) on chromosome 5 of NA19240 were compared with those predicted in other samples in the YRI trio (NA19238 and NA19239), in the CEU trio (NA12878, NA12891, and NA12892), or identified using fosmid ESP<sup>2</sup>, array CGH, and SNP arrays<sup>3</sup>. Results in the upper panel were obtained from the individual analysis, those in the lower panel from the pooled analysis, and those in the four columns using various s.d. and mapping quality (q) thresholds.

| Independent | overlap    | 4SD, q>35 |         |        |         | overlap | 4SD, q>10 |        |         |         | overlap | 3SD, q>35 |         |         |         | overlap | 3SD, q>10 |    |    |    |  |
|-------------|------------|-----------|---------|--------|---------|---------|-----------|--------|---------|---------|---------|-----------|---------|---------|---------|---------|-----------|----|----|----|--|
|             |            | BD        | BD      | BD     | BD      |         | BD        | BD     | BD      | BD      |         | BD        | BD      | BD      | BD      |         | BD        | BD | BD | BD |  |
| NA19238     | 126 164    | 76.83%    | 246     | 51.22% | 161 208 | 77.40%  | 308       | 52.27% | 149 201 | 74.13%  | 309     | 48.22%    | 190 249 | 76.31%  | 375     | 50.67%  |           |    |    |    |  |
| NA19239     | 168 235    | 71.49%    | 246     | 68.29% | 212 309 | 68.61%  | 308       | 68.83% | 207 309 | 66.99%  | 309     | 66.99%    | 258 403 | 64.02%  | 375     | 68.80%  |           |    |    |    |  |
| NA12878     | 88 125     | 70.40%    | 246     | 35.77% | 114 171 | 66.67%  | 308       | 37.01% | 97 140  | 69.29%  | 309     | 31.39%    | 120 200 | 60.00%  | 375     | 32.00%  |           |    |    |    |  |
| NA12891     | 78 120     | 65.00%    | 246     | 31.71% | 102 160 | 63.75%  | 308       | 33.12% | 88 140  | 62.86%  | 309     | 28.48%    | 110 179 | 61.45%  | 375     | 29.33%  |           |    |    |    |  |
| NA12892     | 92 133     | 69.17%    | 246     | 37.40% | 113 163 | 69.33%  | 308       | 36.69% | 94 144  | 65.28%  | 309     | 30.42%    | 113 171 | 66.08%  | 375     | 30.13%  |           |    |    |    |  |
| FOSMID_s8v  | 8 11       | 72.73%    | 246     | 3.25%  | 8 11    | 72.73%  | 308       | 2.60%  | 8 11    | 72.73%  | 309     | 2.59%     | 8 11    | 72.73%  | 375     | 2.13%   |           |    |    |    |  |
| DGV         | 123 722    | 17.04%    | 246     | 50.00% | 142 722 | 19.67%  | 308       | 46.10% | 130 722 | 18.01%  | 309     | 42.07%    | 144 722 | 19.94%  | 375     | 38.40%  |           |    |    |    |  |
| aCGH_WTSI   | 1 1        | 100.00%   | 246     | 0.41%  | 1 1     | 100.00% | 308       | 0.32%  | 1 1     | 100.00% | 309     | 0.32%     | 1 1     | 100.00% | 375     | 0.27%   |           |    |    |    |  |
| Affy6       | 5 10       | 50.00%    | 246     | 2.03%  | 5 10    | 50.00%  | 308       | 1.62%  | 5 10    | 50.00%  | 309     | 1.62%     | 5 10    | 50.00%  | 375     | 1.33%   |           |    |    |    |  |
| Pooled      | NA19238    | 177 220   | 80.45%  | 302    | 58.61%  | 235 286 | 82.17%    | 376    | 62.50%  | 228 277 | 82.31%  | 427       | 53.40%  | 309 365 | 84.66%  | 533     | 57.97%    |    |    |    |  |
|             | NA19239    | 259 323   | 80.19%  | 302    | 85.76%  | 323 408 | 79.17%    | 376    | 85.90%  | 339 430 | 78.84%  | 427       | 79.39%  | 441 545 | 80.92%  | 533     | 82.74%    |    |    |    |  |
|             | NA12878    | 111 161   | 68.94%  | 302    | 36.75%  | 142 220 | 64.55%    | 376    | 37.77%  | 126 184 | 68.48%  | 427       | 29.51%  | 165 270 | 61.11%  | 533     | 30.96%    |    |    |    |  |
|             | NA12891    | 99 146    | 67.81%  | 302    | 32.78%  | 132 209 | 63.16%    | 376    | 35.11%  | 114 170 | 67.06%  | 427       | 26.70%  | 158 258 | 61.24%  | 533     | 29.64%    |    |    |    |  |
|             | NA12892    | 105 152   | 69.08%  | 302    | 34.77%  | 129 199 | 64.82%    | 376    | 34.31%  | 114 180 | 63.33%  | 427       | 26.70%  | 143 241 | 59.34%  | 533     | 26.83%    |    |    |    |  |
|             | FOSMID_s8v | 8 11      | 72.73%  | 302    | 2.65%   | 8 11    | 72.73%    | 376    | 2.13%   | 8 11    | 72.73%  | 427       | 1.87%   | 8 11    | 72.73%  | 533     | 1.50%     |    |    |    |  |
|             | DGV        | 138 722   | 19.11%  | 302    | 45.70%  | 152 722 | 21.05%    | 376    | 40.43%  | 147 722 | 20.36%  | 427       | 34.43%  | 168 722 | 23.27%  | 533     | 31.52%    |    |    |    |  |
|             | aCGH_WTSI  | 1 1       | 100.00% | 302    | 0.33%   | 1 1     | 100.00%   | 376    | 0.27%   | 1 1     | 100.00% | 427       | 0.23%   | 1 1     | 100.00% | 533     | 0.19%     |    |    |    |  |
|             | Affy6      | 5 10      | 50.00%  | 302    | 1.66%   | 5 10    | 50.00%    | 376    | 1.33%   | 5 10    | 50.00%  | 427       | 1.17%   | 5 10    | 50.00%  | 533     | 0.94%     |    |    |    |  |

FOSMID ESP, validated deletions discovered through FOSMID end sequence profiling, Kidd et al. Nature 08

DGV, database of Genomic Variants

WTSIaCGH, CNV calls made by WTSI based on 2.1M Nimblegen array CGH, half of the calls are from the CNVs of the reference

Affy6.0, CNV calls made by Mccarroll et al. 2008 using Array 6.0

Supplementary Table 7 Analytic true positive rate in simulated structural variant detection using a 200 bp insert library.

Inserts are normally distributed with a s.d. of 20 bp. Read length equals to 50 bp.

| Phy_Cov | Seq_Cov | deletion | total_del | percent | insertion | total_ins | percent | indels | total_indels | percent |
|---------|---------|----------|-----------|---------|-----------|-----------|---------|--------|--------------|---------|
| 10      | 5       | 191      | 425       | 44.94%  | 0         | 415       | 0.00%   | 191    | 840          | 22.74%  |
| 20      | 10      | 213      | 425       | 50.12%  | 15        | 415       | 3.61%   | 228    | 840          | 27.14%  |
| 30      | 15      | 237      | 425       | 55.76%  | 56        | 415       | 13.49%  | 293    | 840          | 34.88%  |
| 40      | 20      | 256      | 425       | 60.24%  | 77        | 415       | 18.55%  | 333    | 840          | 39.64%  |
| 50      | 25      | 278      | 425       | 65.41%  | 94        | 415       | 22.65%  | 372    | 840          | 44.29%  |
| 60      | 30      | 294      | 425       | 69.18%  | 114       | 415       | 27.47%  | 408    | 840          | 48.57%  |
| 70      | 35      | 302      | 425       | 71.06%  | 126       | 415       | 30.36%  | 428    | 840          | 50.95%  |
| 80      | 40      | 314      | 425       | 73.88%  | 144       | 415       | 34.70%  | 458    | 840          | 54.52%  |
| 90      | 45      | 325      | 425       | 76.47%  | 153       | 415       | 36.87%  | 478    | 840          | 56.90%  |
| 100     | 50      | 335      | 425       | 78.82%  | 158       | 415       | 38.07%  | 493    | 840          | 58.69%  |
| 110     | 55      | 335      | 425       | 78.82%  | 174       | 415       | 41.93%  | 509    | 840          | 60.60%  |
| 120     | 60      | 352      | 425       | 82.82%  | 182       | 415       | 43.86%  | 534    | 840          | 63.57%  |
| 130     | 65      | 364      | 425       | 85.65%  | 194       | 415       | 46.75%  | 558    | 840          | 66.43%  |
| 140     | 70      | 384      | 425       | 90.35%  | 202       | 415       | 48.67%  | 586    | 840          | 69.76%  |
| 150     | 75      | 384      | 425       | 90.35%  | 231       | 415       | 55.66%  | 615    | 840          | 73.21%  |
| 160     | 80      | 399      | 425       | 93.88%  | 231       | 415       | 55.66%  | 630    | 840          | 75.00%  |
| 170     | 85      | 399      | 425       | 93.88%  | 238       | 415       | 57.35%  | 637    | 840          | 75.83%  |
| 180     | 90      | 425      | 425       | 100.00% | 265       | 415       | 63.86%  | 690    | 840          | 82.14%  |
| 190     | 95      | 425      | 425       | 100.00% | 265       | 415       | 63.86%  | 690    | 840          | 82.14%  |
| 200     | 100     | 425      | 425       | 100.00% | 278       | 415       | 66.99%  | 703    | 840          | 83.69%  |
| 210     | 105     | 425      | 425       | 100.00% | 281       | 415       | 67.71%  | 706    | 840          | 84.05%  |
| 220     | 110     | 425      | 425       | 100.00% | 307       | 415       | 73.98%  | 732    | 840          | 87.14%  |
| 230     | 115     | 425      | 425       | 100.00% | 307       | 415       | 73.98%  | 732    | 840          | 87.14%  |

Supplementary Table 8 Analytic true positive rate in simulated structural variant detection using a 400 bp insert library.

Inserts are normally distributed with a s.d. of 40 bp. Read length equals to 50 bp.

| Physical coverage | Sequence_Coverage | deletion | total_del | insertion | total_ins | indels | total_indels |     |     |        |
|-------------------|-------------------|----------|-----------|-----------|-----------|--------|--------------|-----|-----|--------|
| 10                | 2.5               | 138      | 425       | 32.47%    | 29        | 415    | 6.99%        | 167 | 840 | 19.88% |
| 20                | 5                 | 156      | 425       | 36.71%    | 58        | 415    | 13.98%       | 214 | 840 | 25.48% |
| 30                | 7.5               | 169      | 425       | 39.76%    | 74        | 415    | 17.83%       | 243 | 840 | 28.93% |
| 40                | 10                | 181      | 425       | 42.59%    | 86        | 415    | 20.72%       | 267 | 840 | 31.79% |
| 50                | 12.5              | 187      | 425       | 44.00%    | 91        | 415    | 21.93%       | 278 | 840 | 33.10% |
| 60                | 15                | 198      | 425       | 46.59%    | 98        | 415    | 23.61%       | 296 | 840 | 35.24% |
| 70                | 17.5              | 199      | 425       | 46.82%    | 102       | 415    | 24.58%       | 301 | 840 | 35.83% |
| 80                | 20                | 204      | 425       | 48.00%    | 110       | 415    | 26.51%       | 314 | 840 | 37.38% |
| 90                | 22.5              | 210      | 425       | 49.41%    | 120       | 415    | 28.92%       | 330 | 840 | 39.29% |
| 100               | 25                | 219      | 425       | 51.53%    | 123       | 415    | 29.64%       | 342 | 840 | 40.71% |
| 110               | 27.5              | 221      | 425       | 52.00%    | 131       | 415    | 31.57%       | 352 | 840 | 41.90% |
| 120               | 30                | 229      | 425       | 53.88%    | 133       | 415    | 32.05%       | 362 | 840 | 43.10% |
| 130               | 32.5              | 234      | 425       | 55.06%    | 140       | 415    | 33.73%       | 374 | 840 | 44.52% |
| 140               | 35                | 237      | 425       | 55.76%    | 146       | 415    | 35.18%       | 383 | 840 | 45.60% |
| 150               | 37.5              | 252      | 425       | 59.29%    | 150       | 415    | 36.14%       | 402 | 840 | 47.86% |
| 160               | 40                | 256      | 425       | 60.24%    | 156       | 415    | 37.59%       | 412 | 840 | 49.05% |
| 170               | 42.5              | 267      | 425       | 62.82%    | 171       | 415    | 41.20%       | 438 | 840 | 52.14% |
| 180               | 45                | 271      | 425       | 63.76%    | 176       | 415    | 42.41%       | 447 | 840 | 53.21% |
| 190               | 47.5              | 271      | 425       | 63.76%    | 176       | 415    | 42.41%       | 447 | 840 | 53.21% |
| 200               | 50                | 278      | 425       | 65.41%    | 183       | 415    | 44.10%       | 461 | 840 | 54.88% |
| 210               | 52.5              | 281      | 425       | 66.12%    | 188       | 415    | 45.30%       | 469 | 840 | 55.83% |
| 220               | 55                | 294      | 425       | 69.18%    | 201       | 415    | 48.43%       | 495 | 840 | 58.93% |
| 230               | 57.5              | 294      | 425       | 69.18%    | 206       | 415    | 49.64%       | 500 | 840 | 59.52% |
| 240               | 60                | 302      | 425       | 71.06%    | 206       | 415    | 49.64%       | 508 | 840 | 60.48% |
| 250               | 62.5              | 314      | 425       | 73.88%    | 215       | 415    | 51.81%       | 529 | 840 | 62.98% |
| 260               | 65                | 314      | 425       | 73.88%    | 220       | 415    | 53.01%       | 534 | 840 | 63.57% |
| 270               | 67.5              | 318      | 425       | 74.82%    | 220       | 415    | 53.01%       | 538 | 840 | 64.05% |
| 280               | 70                | 318      | 425       | 74.82%    | 233       | 415    | 56.14%       | 551 | 840 | 65.60% |
| 290               | 72.5              | 325      | 425       | 76.47%    | 233       | 415    | 56.14%       | 558 | 840 | 66.43% |
| 300               | 75                | 325      | 425       | 76.47%    | 241       | 415    | 58.07%       | 566 | 840 | 67.38% |
| 310               | 77.5              | 335      | 425       | 78.82%    | 241       | 415    | 58.07%       | 576 | 840 | 68.57% |
| 320               | 80                | 335      | 425       | 78.82%    | 253       | 415    | 60.96%       | 588 | 840 | 70.00% |
| 330               | 82.5              | 352      | 425       | 82.82%    | 253       | 415    | 60.96%       | 605 | 840 | 72.02% |
| 340               | 85                | 352      | 425       | 82.82%    | 261       | 415    | 62.89%       | 613 | 840 | 72.98% |
| 350               | 87.5              | 364      | 425       | 85.65%    | 261       | 415    | 62.89%       | 625 | 840 | 74.40% |
| 360               | 90                | 364      | 425       | 85.65%    | 290       | 415    | 69.88%       | 654 | 840 | 77.86% |
| 370               | 92.5              | 364      | 425       | 85.65%    | 290       | 415    | 69.88%       | 654 | 840 | 77.86% |
| 380               | 95                | 384      | 425       | 90.35%    | 297       | 415    | 71.57%       | 681 | 840 | 81.07% |
| 390               | 97.5              | 384      | 425       | 90.35%    | 297       | 415    | 71.57%       | 681 | 840 | 81.07% |
| 400               | 100               | 384      | 425       | 90.35%    | 297       | 415    | 71.57%       | 681 | 840 | 81.07% |
| 410               | 102.5             | 399      | 425       | 93.88%    | 324       | 415    | 78.07%       | 723 | 840 | 86.07% |
| 420               | 105               | 399      | 425       | 93.88%    | 324       | 415    | 78.07%       | 723 | 840 | 86.07% |
| 430               | 107.5             | 425      | 425       | 100.00%   | 324       | 415    | 78.07%       | 749 | 840 | 89.17% |
| 440               | 110               | 425      | 425       | 100.00%   | 337       | 415    | 81.20%       | 762 | 840 | 90.71% |
| 450               | 112.5             | 425      | 425       | 100.00%   | 337       | 415    | 81.20%       | 762 | 840 | 90.71% |
| 460               | 115               | 425      | 425       | 100.00%   | 337       | 415    | 81.20%       | 762 | 840 | 90.71% |
| 470               | 117.5             | 425      | 425       | 100.00%   | 363       | 415    | 87.47%       | 788 | 840 | 93.81% |
| 480               | 120               | 425      | 425       | 100.00%   | 363       | 415    | 87.47%       | 788 | 840 | 93.81% |
| 490               | 122.5             | 425      | 425       | 100.00%   | 363       | 415    | 87.47%       | 788 | 840 | 93.81% |
| 500               | 125               | 425      | 425       | 100.00%   | 363       | 415    | 87.47%       | 788 | 840 | 93.81% |

## Supplementary Notes Additional results in simulation

### Variant assembly from the simulated data

We have tried to assemble the 840 known regions on chromosome 17 of Venter's genome using our simulation data at 100 ×. Of the 838 regions examined, 408 structural variants were called. 376 (92%) are of the correct type, 243 (65%) of which also have the exact size. 46/376 (12.2%) of the correct assembly calls were not called by BreakDancerMax while 291/621 (47%) of the correct BreakDancerMax structural variant calls were not called by assembly. The primary difficulty is that this set contain many simple/tandem repeats that are difficult to assemble.

### The Effect of MAQ mapping quality threshold in simulation

The performance is generally similar but less sensitive with mapping quality > 35 than with mapping quality > 10. For example, at 100 × coverage, BreakDancerMax achieved a 423/844 (50.12%) true positive rate and 36/460 (8.04%) false positive rate with mapping quality > 35.

## References

1. Li, H., Ruan, J. & Durbin, R. Mapping short DNA sequencing reads and calling variants using mapping quality scores. *Genome Res* **18**, 1851-8 (2008).
2. Kidd, J.M. et al. Mapping and sequencing of structural variation from eight human genomes. *Nature* **453**, 56-64 (2008).
3. McCarroll, S.A. et al. Integrated detection and population-genetic analysis of SNPs and copy number variation. *Nat Genet* **40**, 1166-74 (2008).
